# Supplementary material
Source: PubMed Central journal article supplement (PMC9579964)
Supplement: NIHMS1838968-supplement-1838968_RS.pdf [file NIHMS1838968-supplement-1838968_RS.pdf]

## Reporting Summary

Nature Research wishes to improve the reproducibility of the work that we publish. This form provides structure for consistency and transparency in reporting. For further information on Nature Research policies, see our [Editorial Policies](#) and the [Editorial Policy Checklist](#).

### Statistics

For all statistical analyses, confirm that the following items are present in the figure legend, table legend, main text, or Methods section.

n/a Confirmed

- The exact sample size ( $n$ ) for each experimental group/condition, given as a discrete number and unit of measurement
- A statement on whether measurements were taken from distinct samples or whether the same sample was measured repeatedly
- The statistical test(s) used AND whether they are one- or two-sided  
*Only common tests should be described solely by name; describe more complex techniques in the Methods section.*
- A description of all covariates tested
- A description of any assumptions or corrections, such as tests of normality and adjustment for multiple comparisons
- A full description of the statistical parameters including central tendency (e.g. means) or other basic estimates (e.g. regression coefficient) AND variation (e.g. standard deviation) or associated estimates of uncertainty (e.g. confidence intervals)
- For null hypothesis testing, the test statistic (e.g.  $F$ ,  $t$ ,  $r$ ) with confidence intervals, effect sizes, degrees of freedom and  $P$  value noted  
*Give  $P$  values as exact values whenever suitable.*
- For Bayesian analysis, information on the choice of priors and Markov chain Monte Carlo settings
- For hierarchical and complex designs, identification of the appropriate level for tests and full reporting of outcomes
- Estimates of effect sizes (e.g. Cohen's  $d$ , Pearson's  $r$ ), indicating how they were calculated

*Our web collection on [statistics for biologists](#) contains articles on many of the points above.*

### Software and code

Policy information about [availability of computer code](#)

**Data collection** Sequencing is performed on Hi-Seq2000 of Illumina in single end read mode with read length of 50 bp (RNAseq), or in paired end read mode with read length of 150 nucleotides (ChIPseq, DNase-seq, CUT&RUN and Hi-C). Flow cytometry data were collected on FACSVerser cytometer.

**Data analysis** For nextgen sequencing data, the following was used: Juicer(v1.21.01), hiclib(v0.8.0 <https://github.com/mirnylab/hiclib-legacy>), WashU Epigenome Browser, UCSC Genome Browser, FastQC (v0.11.4), Cutadapt(v3.4), Trim Galore(0.6.4\_dev), bowtie2(v2.2.5), samtools(v1.7), Picard(v.2.21.6, <http://broadinstitute.github.io/picard/>), bedtools(v.2.30.0), MACS2(v2.1.1), SICER(v1.1), R(4.0.4), deeptools(3.5.1), edgeR(v.3.28.1), chromVAR(v.1.12.0), motifmatchr(v.1.12.0), HOMER(v.4.11), Cuffdiff(v2.2.1), Tophat(v2.1.0), GSEA(v4.1.0), LiftOver tool. For HiChub analysis, please refer the algorithm at <https://github.com/WeiqunPengLab/HiChub>. Details were listed in the method section. Flow cytometry data were analyzed on FlowJo v10.2 (TreeStar) and statistical analysis performed on Prism v8.0 (GraphPad).

For manuscripts utilizing custom algorithms or software that are central to the research but not yet described in published literature, software must be made available to editors and reviewers. We strongly encourage code deposition in a community repository (e.g. GitHub). See the Nature Research [guidelines for submitting code & software](#) for further information.

### Data

Policy information about [availability of data](#)

All manuscripts must include a [data availability statement](#). This statement should provide the following information, where applicable:

- Accession codes, unique identifiers, or web links for publicly available datasets
- A list of figures that have associated raw data
- A description of any restrictions on data availability

The data reported in this paper are tabulated in the Supplementary Materials and archived on the GEO database under accession number GSE179775.

## Field-specific reporting

Please select the one below that is the best fit for your research. If you are not sure, read the appropriate sections before making your selection.

Life sciences       Behavioural & social sciences       Ecological, evolutionary & environmental sciences

For a reference copy of the document with all sections, see [nature.com/documents/nr-reporting-summary-flat.pdf](https://www.nature.com/documents/nr-reporting-summary-flat.pdf)

## Life sciences study design

All studies must disclose on these points even when the disclosure is negative.

|                 |                                                                                                                                                                                                                                                                                         |
|-----------------|-----------------------------------------------------------------------------------------------------------------------------------------------------------------------------------------------------------------------------------------------------------------------------------------|
| Sample size     | No sample size was predetermined through calculation. All multiomics data were collected from at least two independent experiments, in two-four replicates, which are sufficient to provide statistical power in nextgen sequencing data analysis.                                      |
| Data exclusions | No data were excluded from analyses.                                                                                                                                                                                                                                                    |
| Replication     | For all experiments, at least two biological replicates were analyzed in at least two independent experiments. All the replicates showed consistent reproducibility or distinct clusters in nextgen sequencing analyses.                                                                |
| Randomization   | Mice are randomly selected from a pool of 6-12 weeks mice for phenotypic analysis or sorting for Hi-C or multiomics analyses.                                                                                                                                                           |
| Blinding        | The investigators were not blinded to the group allocation during data collection or analysis. Blinding is not appropriate for biological assays because the investigators have to know the genotypes of donor cells. Blinding is not relevant for analysis of nextgen sequencing data. |

## Reporting for specific materials, systems and methods

We require information from authors about some types of materials, experimental systems and methods used in many studies. Here, indicate whether each material, system or method listed is relevant to your study. If you are not sure if a list item applies to your research, read the appropriate section before selecting a response.

### Materials & experimental systems

### Methods

| n/a                                 | Involvement                                                     | n/a                                 | Involvement                                        |
|-------------------------------------|-----------------------------------------------------------------|-------------------------------------|----------------------------------------------------|
| <input type="checkbox"/>            | <input checked="" type="checkbox"/> Antibodies                  | <input type="checkbox"/>            | <input checked="" type="checkbox"/> ChIP-seq       |
| <input checked="" type="checkbox"/> | <input type="checkbox"/> Eukaryotic cell lines                  | <input type="checkbox"/>            | <input checked="" type="checkbox"/> Flow cytometry |
| <input checked="" type="checkbox"/> | <input type="checkbox"/> Palaeontology and archaeology          | <input checked="" type="checkbox"/> | <input type="checkbox"/> MRI-based neuroimaging    |
| <input type="checkbox"/>            | <input checked="" type="checkbox"/> Animals and other organisms |                                     |                                                    |
| <input checked="" type="checkbox"/> | <input type="checkbox"/> Human research participants            |                                     |                                                    |
| <input checked="" type="checkbox"/> | <input type="checkbox"/> Clinical data                          |                                     |                                                    |
| <input checked="" type="checkbox"/> | <input type="checkbox"/> Dual use research of concern           |                                     |                                                    |

## Antibodies

|                 |                                                                                                                                                                                                                                                                                                                                                                                                                                                                                                                                                                                                                                                                                                                                                                                                                                                                                                                                                                                                                                                                                                                                                                                                                                                                                                                                                                                                                                                                                                                                                                                                                                                                                                                                                                                                                                                                                  |
|-----------------|----------------------------------------------------------------------------------------------------------------------------------------------------------------------------------------------------------------------------------------------------------------------------------------------------------------------------------------------------------------------------------------------------------------------------------------------------------------------------------------------------------------------------------------------------------------------------------------------------------------------------------------------------------------------------------------------------------------------------------------------------------------------------------------------------------------------------------------------------------------------------------------------------------------------------------------------------------------------------------------------------------------------------------------------------------------------------------------------------------------------------------------------------------------------------------------------------------------------------------------------------------------------------------------------------------------------------------------------------------------------------------------------------------------------------------------------------------------------------------------------------------------------------------------------------------------------------------------------------------------------------------------------------------------------------------------------------------------------------------------------------------------------------------------------------------------------------------------------------------------------------------|
| Antibodies used | <p>Antibodies used in this studies were listed in Methods. Specifically: The fluorochrome-conjugated antibodies were as follows: anti-CD4 (RM4-5), anti-CD8 (53-6.7), anti-TCR<math>\alpha</math> (H57-597), anti-CD45.1 (A20), anti-CD45.2 (104), anti-CD62L (MEL-14), anti-IL-2R<math>\beta</math> (TM-<math>\beta</math>1), anti-IL-7R<math>\alpha</math> (A7R34), anti-Eomes (Dan11mag), anti-CD25 (PC61.5), anti-CD69 (H1.2F3), anti-ICOS (C398.4A), and anti-CD44 (IM7) were from Thermo Fisher Scientific; anti-<math>\gamma</math>c (TUGm2) and anti-PD1 (RMP1-30) from BioLegend; anti-Tcf1 (C63D9) and anti-Lef1 (C12A5) from Cell Signaling Technology;</p> <p>For immunoblotting: anti-pY694-STAT5a (clone: C11C5, Cell Signaling Technology), pS473-Akt (clone: 193H12, Cell Signaling Technology), total Stat5a (clone ST5a-2H2, ThermoFisher Scientific), and total Akt (C67E7, Cell Signaling Technology). anti-CTCF (JM10-61, Invitrogen/ThermoFisher Scientific) or anti-Tcf1 antibodies (C63D9, Cell Signaling Technology). anti-HA (C29F4, Cell Signaling Technology);</p> <p>For coIP: anti-FLAG M2 Magnetic Beads (MilliporeSigma), anti-FLAG antibody (clone M2, #F3165, MilliporeSigma), anti-Tcf1 rabbit polyclonal antibody (#14464-1-AP, ProteinTech), anti-CTCF rabbit polyclonal antibody (#07-729, MilliporeSigma);</p> <p>For CUT&amp;RUN: anti-CTCF antiserum (Active Motif);</p> <p>For ChIP-seq: anti-CTCF rabbit polyclonal antibody from Millipore Sigma (#07-729, with human CTCF 659-675 peptides as immunogen), anti-CTCF rabbit monoclonal antibody from Cell Signaling Technology (D31H2, with a synthetic peptide from human CTCF as immunogen, precise location undisclosed), anti-CTCF mouse monoclonal polyclonal antibody form Santa Cruz Biotechnology (#sc-271514, clone B-5, with human CTCF 643-687 peptides as immunogen)</p> |
| Validation      | The antibodies are validated by the manufacturers, as appears on the manufacturers' websites.                                                                                                                                                                                                                                                                                                                                                                                                                                                                                                                                                                                                                                                                                                                                                                                                                                                                                                                                                                                                                                                                                                                                                                                                                                                                                                                                                                                                                                                                                                                                                                                                                                                                                                                                                                                    |

## Animals and other organisms

Policy information about [studies involving animals](#); [ARRIVE guidelines](#) recommended for reporting animal research

|                         |                                                                                                                                                                                                                                                                                                                                                                                                                                                                                                                                                                                                                                                                                                                                                                                                |
|-------------------------|------------------------------------------------------------------------------------------------------------------------------------------------------------------------------------------------------------------------------------------------------------------------------------------------------------------------------------------------------------------------------------------------------------------------------------------------------------------------------------------------------------------------------------------------------------------------------------------------------------------------------------------------------------------------------------------------------------------------------------------------------------------------------------------------|
| Laboratory animals      | Laboratory animals used in this study are described in the "Methods" section. Specifically, C57BL/6J (B6), B6.SJL, Rag1 <sup>-/-</sup> , hCD2-Cre, and Rosa26GFP mice were from the Jackson Laboratory, Tcf7FL/FL and Lef1FL/FL mice were previously generated in the authors' laboratory. Ctcfl/FL mice were provided by N. Galjart (Erasmus University Medical Center, the Netherlands) and A. Melnick (Weill Cornell Medicine). All compound mouse strains used in this work were from in-house breeding at the animal care facilities of University of Iowa and Center for Discovery and Innovation, Hackensack University Medical Center. All mice, if not specifically mentioned in this manuscript, were 6–12 weeks of age, and both sexes were used without randomization or blinding. |
| Wild animals            | No wild animals were used in this study.                                                                                                                                                                                                                                                                                                                                                                                                                                                                                                                                                                                                                                                                                                                                                       |
| Field-collected samples | Study did not involve samples collected in the field.                                                                                                                                                                                                                                                                                                                                                                                                                                                                                                                                                                                                                                                                                                                                          |
| Ethics oversight        | All experiments are performed under the protocol approved by the Institutional Animal Use and Care Committees of the University of Iowa and Center for Discovery and Innovation, Hackensack University Medical Center.                                                                                                                                                                                                                                                                                                                                                                                                                                                                                                                                                                         |

Note that full information on the approval of the study protocol must also be provided in the manuscript.

## ChIP-seq

### Data deposition

- Confirm that both raw and final processed data have been deposited in a public database such as [GEO](#).
- Confirm that you have deposited or provided access to graph files (e.g. BED files) for the called peaks.

|                                                                    |                                                                                                                                                                                                                                                                                                                                                                                                                                                                                        |
|--------------------------------------------------------------------|----------------------------------------------------------------------------------------------------------------------------------------------------------------------------------------------------------------------------------------------------------------------------------------------------------------------------------------------------------------------------------------------------------------------------------------------------------------------------------------|
| Data access links<br><i>May remain private before publication.</i> | Go to <a href="https://www.ncbi.nlm.nih.gov/geo/query/acc.cgi?acc=GSE192758">https://www.ncbi.nlm.nih.gov/geo/query/acc.cgi?acc=GSE192758</a><br>Enter token "udshmwuappdydpgd" into the box                                                                                                                                                                                                                                                                                           |
| Files in database submission                                       | WT naive CD8, CTCF ChIP-seq SantaCruz Ab, rep1<br>WT naive CD8, CTCF ChIP-seq SantaCruz Ab, rep2<br>WT naive CD8, CTCF ChIP-seq SantaCruz Ab, rep3<br>WT naive CD8, CTCF ChIP-seq SantaCruz Ab, rep4<br>Tcf1/Lef1-deficient CD8, CTCF ChIP-seq SantaCruz Ab, rep1<br>Tcf1/Lef1-deficient CD8, CTCF ChIP-seq SantaCruz Ab, rep2<br>Tcf1/Lef1-deficient CD8, CTCF ChIP-seq SantaCruz Ab, rep3<br>Tcf1/Lef1-deficient CD8, CTCF ChIP-seq SantaCruz Ab, rep4<br>WT naive CD8, IgG ChIP-seq |
| Genome browser session<br>(e.g. <a href="#">UCSC</a> )             | <a href="https://genome.ucsc.edu/s/ShaoqiZhu/CD8HP">https://genome.ucsc.edu/s/ShaoqiZhu/CD8HP</a>                                                                                                                                                                                                                                                                                                                                                                                      |

### Methodology

| Replicates                                                | <table border="0"> <tr><td>WT naive CD8, CTCF ChIP-seq SantaCruz Ab, rep1</td><td>GSM6042355</td><td>ChIP-seq</td></tr> <tr><td>WT naive CD8, CTCF ChIP-seq SantaCruz Ab, rep2</td><td>GSM6042356</td><td>ChIP-seq</td></tr> <tr><td>WT naive CD8, CTCF ChIP-seq SantaCruz Ab, rep3</td><td>GSM6042357</td><td>ChIP-seq</td></tr> <tr><td>WT naive CD8, CTCF ChIP-seq SantaCruz Ab, rep4</td><td>GSM6042358</td><td>ChIP-seq</td></tr> <tr><td>Tcf1/Lef1-deficient CD8, CTCF ChIP-seq SantaCruz Ab, rep1</td><td>GSM6042363</td><td>ChIP-seq</td></tr> <tr><td>Tcf1/Lef1-deficient CD8, CTCF ChIP-seq SantaCruz Ab, rep2</td><td>GSM6042364</td><td>ChIP-seq</td></tr> <tr><td>Tcf1/Lef1-deficient CD8, CTCF ChIP-seq SantaCruz Ab, rep3</td><td>GSM6042365</td><td>ChIP-seq</td></tr> <tr><td>Tcf1/Lef1-deficient CD8, CTCF ChIP-seq SantaCruz Ab, rep4</td><td>GSM6042366</td><td>ChIP-seq</td></tr> <tr><td>WT naive CD8, IgG ChIP-seq</td><td>GSM6042371</td><td>ChIP-seq</td></tr> </table>                                                                                                                                                                                                                                                                                                                                                                                                                                                                                                                                                                                                                                                                | WT naive CD8, CTCF ChIP-seq SantaCruz Ab, rep1 | GSM6042355      | ChIP-seq             | WT naive CD8, CTCF ChIP-seq SantaCruz Ab, rep2 | GSM6042356           | ChIP-seq                                       | WT naive CD8, CTCF ChIP-seq SantaCruz Ab, rep3 | GSM6042357 | ChIP-seq | WT naive CD8, CTCF ChIP-seq SantaCruz Ab, rep4 | GSM6042358                                     | ChIP-seq | Tcf1/Lef1-deficient CD8, CTCF ChIP-seq SantaCruz Ab, rep1 | GSM6042363 | ChIP-seq   | Tcf1/Lef1-deficient CD8, CTCF ChIP-seq SantaCruz Ab, rep2 | GSM6042364 | ChIP-seq | Tcf1/Lef1-deficient CD8, CTCF ChIP-seq SantaCruz Ab, rep3 | GSM6042365 | ChIP-seq                                       | Tcf1/Lef1-deficient CD8, CTCF ChIP-seq SantaCruz Ab, rep4 | GSM6042366 | ChIP-seq | WT naive CD8, IgG ChIP-seq | GSM6042371                                                | ChIP-seq |          |     |            |                                                           |          |          |     |            |                                                           |          |          |     |            |                                                           |          |         |     |            |            |          |         |     |            |            |          |         |     |            |               |          |         |     |            |
|-----------------------------------------------------------|-----------------------------------------------------------------------------------------------------------------------------------------------------------------------------------------------------------------------------------------------------------------------------------------------------------------------------------------------------------------------------------------------------------------------------------------------------------------------------------------------------------------------------------------------------------------------------------------------------------------------------------------------------------------------------------------------------------------------------------------------------------------------------------------------------------------------------------------------------------------------------------------------------------------------------------------------------------------------------------------------------------------------------------------------------------------------------------------------------------------------------------------------------------------------------------------------------------------------------------------------------------------------------------------------------------------------------------------------------------------------------------------------------------------------------------------------------------------------------------------------------------------------------------------------------------------------------------------------------------------------------------------------------------------|------------------------------------------------|-----------------|----------------------|------------------------------------------------|----------------------|------------------------------------------------|------------------------------------------------|------------|----------|------------------------------------------------|------------------------------------------------|----------|-----------------------------------------------------------|------------|------------|-----------------------------------------------------------|------------|----------|-----------------------------------------------------------|------------|------------------------------------------------|-----------------------------------------------------------|------------|----------|----------------------------|-----------------------------------------------------------|----------|----------|-----|------------|-----------------------------------------------------------|----------|----------|-----|------------|-----------------------------------------------------------|----------|----------|-----|------------|-----------------------------------------------------------|----------|---------|-----|------------|------------|----------|---------|-----|------------|------------|----------|---------|-----|------------|---------------|----------|---------|-----|------------|
| WT naive CD8, CTCF ChIP-seq SantaCruz Ab, rep1            | GSM6042355                                                                                                                                                                                                                                                                                                                                                                                                                                                                                                                                                                                                                                                                                                                                                                                                                                                                                                                                                                                                                                                                                                                                                                                                                                                                                                                                                                                                                                                                                                                                                                                                                                                      | ChIP-seq                                       |                 |                      |                                                |                      |                                                |                                                |            |          |                                                |                                                |          |                                                           |            |            |                                                           |            |          |                                                           |            |                                                |                                                           |            |          |                            |                                                           |          |          |     |            |                                                           |          |          |     |            |                                                           |          |          |     |            |                                                           |          |         |     |            |            |          |         |     |            |            |          |         |     |            |               |          |         |     |            |
| WT naive CD8, CTCF ChIP-seq SantaCruz Ab, rep2            | GSM6042356                                                                                                                                                                                                                                                                                                                                                                                                                                                                                                                                                                                                                                                                                                                                                                                                                                                                                                                                                                                                                                                                                                                                                                                                                                                                                                                                                                                                                                                                                                                                                                                                                                                      | ChIP-seq                                       |                 |                      |                                                |                      |                                                |                                                |            |          |                                                |                                                |          |                                                           |            |            |                                                           |            |          |                                                           |            |                                                |                                                           |            |          |                            |                                                           |          |          |     |            |                                                           |          |          |     |            |                                                           |          |          |     |            |                                                           |          |         |     |            |            |          |         |     |            |            |          |         |     |            |               |          |         |     |            |
| WT naive CD8, CTCF ChIP-seq SantaCruz Ab, rep3            | GSM6042357                                                                                                                                                                                                                                                                                                                                                                                                                                                                                                                                                                                                                                                                                                                                                                                                                                                                                                                                                                                                                                                                                                                                                                                                                                                                                                                                                                                                                                                                                                                                                                                                                                                      | ChIP-seq                                       |                 |                      |                                                |                      |                                                |                                                |            |          |                                                |                                                |          |                                                           |            |            |                                                           |            |          |                                                           |            |                                                |                                                           |            |          |                            |                                                           |          |          |     |            |                                                           |          |          |     |            |                                                           |          |          |     |            |                                                           |          |         |     |            |            |          |         |     |            |            |          |         |     |            |               |          |         |     |            |
| WT naive CD8, CTCF ChIP-seq SantaCruz Ab, rep4            | GSM6042358                                                                                                                                                                                                                                                                                                                                                                                                                                                                                                                                                                                                                                                                                                                                                                                                                                                                                                                                                                                                                                                                                                                                                                                                                                                                                                                                                                                                                                                                                                                                                                                                                                                      | ChIP-seq                                       |                 |                      |                                                |                      |                                                |                                                |            |          |                                                |                                                |          |                                                           |            |            |                                                           |            |          |                                                           |            |                                                |                                                           |            |          |                            |                                                           |          |          |     |            |                                                           |          |          |     |            |                                                           |          |          |     |            |                                                           |          |         |     |            |            |          |         |     |            |            |          |         |     |            |               |          |         |     |            |
| Tcf1/Lef1-deficient CD8, CTCF ChIP-seq SantaCruz Ab, rep1 | GSM6042363                                                                                                                                                                                                                                                                                                                                                                                                                                                                                                                                                                                                                                                                                                                                                                                                                                                                                                                                                                                                                                                                                                                                                                                                                                                                                                                                                                                                                                                                                                                                                                                                                                                      | ChIP-seq                                       |                 |                      |                                                |                      |                                                |                                                |            |          |                                                |                                                |          |                                                           |            |            |                                                           |            |          |                                                           |            |                                                |                                                           |            |          |                            |                                                           |          |          |     |            |                                                           |          |          |     |            |                                                           |          |          |     |            |                                                           |          |         |     |            |            |          |         |     |            |            |          |         |     |            |               |          |         |     |            |
| Tcf1/Lef1-deficient CD8, CTCF ChIP-seq SantaCruz Ab, rep2 | GSM6042364                                                                                                                                                                                                                                                                                                                                                                                                                                                                                                                                                                                                                                                                                                                                                                                                                                                                                                                                                                                                                                                                                                                                                                                                                                                                                                                                                                                                                                                                                                                                                                                                                                                      | ChIP-seq                                       |                 |                      |                                                |                      |                                                |                                                |            |          |                                                |                                                |          |                                                           |            |            |                                                           |            |          |                                                           |            |                                                |                                                           |            |          |                            |                                                           |          |          |     |            |                                                           |          |          |     |            |                                                           |          |          |     |            |                                                           |          |         |     |            |            |          |         |     |            |            |          |         |     |            |               |          |         |     |            |
| Tcf1/Lef1-deficient CD8, CTCF ChIP-seq SantaCruz Ab, rep3 | GSM6042365                                                                                                                                                                                                                                                                                                                                                                                                                                                                                                                                                                                                                                                                                                                                                                                                                                                                                                                                                                                                                                                                                                                                                                                                                                                                                                                                                                                                                                                                                                                                                                                                                                                      | ChIP-seq                                       |                 |                      |                                                |                      |                                                |                                                |            |          |                                                |                                                |          |                                                           |            |            |                                                           |            |          |                                                           |            |                                                |                                                           |            |          |                            |                                                           |          |          |     |            |                                                           |          |          |     |            |                                                           |          |          |     |            |                                                           |          |         |     |            |            |          |         |     |            |            |          |         |     |            |               |          |         |     |            |
| Tcf1/Lef1-deficient CD8, CTCF ChIP-seq SantaCruz Ab, rep4 | GSM6042366                                                                                                                                                                                                                                                                                                                                                                                                                                                                                                                                                                                                                                                                                                                                                                                                                                                                                                                                                                                                                                                                                                                                                                                                                                                                                                                                                                                                                                                                                                                                                                                                                                                      | ChIP-seq                                       |                 |                      |                                                |                      |                                                |                                                |            |          |                                                |                                                |          |                                                           |            |            |                                                           |            |          |                                                           |            |                                                |                                                           |            |          |                            |                                                           |          |          |     |            |                                                           |          |          |     |            |                                                           |          |          |     |            |                                                           |          |         |     |            |            |          |         |     |            |            |          |         |     |            |               |          |         |     |            |
| WT naive CD8, IgG ChIP-seq                                | GSM6042371                                                                                                                                                                                                                                                                                                                                                                                                                                                                                                                                                                                                                                                                                                                                                                                                                                                                                                                                                                                                                                                                                                                                                                                                                                                                                                                                                                                                                                                                                                                                                                                                                                                      | ChIP-seq                                       |                 |                      |                                                |                      |                                                |                                                |            |          |                                                |                                                |          |                                                           |            |            |                                                           |            |          |                                                           |            |                                                |                                                           |            |          |                            |                                                           |          |          |     |            |                                                           |          |          |     |            |                                                           |          |          |     |            |                                                           |          |         |     |            |            |          |         |     |            |            |          |         |     |            |               |          |         |     |            |
| Sequencing depth                                          | <table border="0"> <thead> <tr><th>Replicates</th><th>total reads</th><th>unique reads</th><th>length of reads</th><th>paired or single-end</th></tr> </thead> <tbody> <tr><td>WT naive CD8, CTCF ChIP-seq SantaCruz Ab, rep1</td><td>22566785</td><td>12023762</td><td>100</td><td>paired-end</td></tr> <tr><td>WT naive CD8, CTCF ChIP-seq SantaCruz Ab, rep2</td><td>15212634</td><td>9083672</td><td>100</td><td>paired-end</td></tr> <tr><td>WT naive CD8, CTCF ChIP-seq SantaCruz Ab, rep3</td><td>26969353</td><td>15694071</td><td>100</td><td>paired-end</td></tr> <tr><td>WT naive CD8, CTCF ChIP-seq SantaCruz Ab, rep4</td><td>30135444</td><td>13375634</td><td>100</td><td>paired-end</td></tr> <tr><td>Tcf1/Lef1-deficient CD8, CTCF ChIP-seq SantaCruz Ab, rep1</td><td>30933509</td><td>13686174</td><td>100</td><td>paired-end</td></tr> <tr><td>Tcf1/Lef1-deficient CD8, CTCF ChIP-seq SantaCruz Ab, rep2</td><td>23355650</td><td>12270903</td><td>100</td><td>paired-end</td></tr> <tr><td>Tcf1/Lef1-deficient CD8, CTCF ChIP-seq SantaCruz Ab, rep3</td><td>26923428</td><td>14160988</td><td>100</td><td>paired-end</td></tr> <tr><td>Tcf1/Lef1-deficient CD8, CTCF ChIP-seq SantaCruz Ab, rep4</td><td>23035585</td><td>8626642</td><td>100</td><td>paired-end</td></tr> <tr><td>WT-NA-IgG1</td><td>22007897</td><td>3089587</td><td>100</td><td>paired-end</td></tr> <tr><td>WT-NA-IgG2</td><td>30755638</td><td>7705503</td><td>100</td><td>paired-end</td></tr> <tr><td>WT-Na-cst-igg</td><td>20969674</td><td>1830745</td><td>100</td><td>paired-end</td></tr> </tbody> </table> <p>All reads are trimmed 50bp from the 3' end.</p> | Replicates                                     | total reads     | unique reads         | length of reads                                | paired or single-end | WT naive CD8, CTCF ChIP-seq SantaCruz Ab, rep1 | 22566785                                       | 12023762   | 100      | paired-end                                     | WT naive CD8, CTCF ChIP-seq SantaCruz Ab, rep2 | 15212634 | 9083672                                                   | 100        | paired-end | WT naive CD8, CTCF ChIP-seq SantaCruz Ab, rep3            | 26969353   | 15694071 | 100                                                       | paired-end | WT naive CD8, CTCF ChIP-seq SantaCruz Ab, rep4 | 30135444                                                  | 13375634   | 100      | paired-end                 | Tcf1/Lef1-deficient CD8, CTCF ChIP-seq SantaCruz Ab, rep1 | 30933509 | 13686174 | 100 | paired-end | Tcf1/Lef1-deficient CD8, CTCF ChIP-seq SantaCruz Ab, rep2 | 23355650 | 12270903 | 100 | paired-end | Tcf1/Lef1-deficient CD8, CTCF ChIP-seq SantaCruz Ab, rep3 | 26923428 | 14160988 | 100 | paired-end | Tcf1/Lef1-deficient CD8, CTCF ChIP-seq SantaCruz Ab, rep4 | 23035585 | 8626642 | 100 | paired-end | WT-NA-IgG1 | 22007897 | 3089587 | 100 | paired-end | WT-NA-IgG2 | 30755638 | 7705503 | 100 | paired-end | WT-Na-cst-igg | 20969674 | 1830745 | 100 | paired-end |
| Replicates                                                | total reads                                                                                                                                                                                                                                                                                                                                                                                                                                                                                                                                                                                                                                                                                                                                                                                                                                                                                                                                                                                                                                                                                                                                                                                                                                                                                                                                                                                                                                                                                                                                                                                                                                                     | unique reads                                   | length of reads | paired or single-end |                                                |                      |                                                |                                                |            |          |                                                |                                                |          |                                                           |            |            |                                                           |            |          |                                                           |            |                                                |                                                           |            |          |                            |                                                           |          |          |     |            |                                                           |          |          |     |            |                                                           |          |          |     |            |                                                           |          |         |     |            |            |          |         |     |            |            |          |         |     |            |               |          |         |     |            |
| WT naive CD8, CTCF ChIP-seq SantaCruz Ab, rep1            | 22566785                                                                                                                                                                                                                                                                                                                                                                                                                                                                                                                                                                                                                                                                                                                                                                                                                                                                                                                                                                                                                                                                                                                                                                                                                                                                                                                                                                                                                                                                                                                                                                                                                                                        | 12023762                                       | 100             | paired-end           |                                                |                      |                                                |                                                |            |          |                                                |                                                |          |                                                           |            |            |                                                           |            |          |                                                           |            |                                                |                                                           |            |          |                            |                                                           |          |          |     |            |                                                           |          |          |     |            |                                                           |          |          |     |            |                                                           |          |         |     |            |            |          |         |     |            |            |          |         |     |            |               |          |         |     |            |
| WT naive CD8, CTCF ChIP-seq SantaCruz Ab, rep2            | 15212634                                                                                                                                                                                                                                                                                                                                                                                                                                                                                                                                                                                                                                                                                                                                                                                                                                                                                                                                                                                                                                                                                                                                                                                                                                                                                                                                                                                                                                                                                                                                                                                                                                                        | 9083672                                        | 100             | paired-end           |                                                |                      |                                                |                                                |            |          |                                                |                                                |          |                                                           |            |            |                                                           |            |          |                                                           |            |                                                |                                                           |            |          |                            |                                                           |          |          |     |            |                                                           |          |          |     |            |                                                           |          |          |     |            |                                                           |          |         |     |            |            |          |         |     |            |            |          |         |     |            |               |          |         |     |            |
| WT naive CD8, CTCF ChIP-seq SantaCruz Ab, rep3            | 26969353                                                                                                                                                                                                                                                                                                                                                                                                                                                                                                                                                                                                                                                                                                                                                                                                                                                                                                                                                                                                                                                                                                                                                                                                                                                                                                                                                                                                                                                                                                                                                                                                                                                        | 15694071                                       | 100             | paired-end           |                                                |                      |                                                |                                                |            |          |                                                |                                                |          |                                                           |            |            |                                                           |            |          |                                                           |            |                                                |                                                           |            |          |                            |                                                           |          |          |     |            |                                                           |          |          |     |            |                                                           |          |          |     |            |                                                           |          |         |     |            |            |          |         |     |            |            |          |         |     |            |               |          |         |     |            |
| WT naive CD8, CTCF ChIP-seq SantaCruz Ab, rep4            | 30135444                                                                                                                                                                                                                                                                                                                                                                                                                                                                                                                                                                                                                                                                                                                                                                                                                                                                                                                                                                                                                                                                                                                                                                                                                                                                                                                                                                                                                                                                                                                                                                                                                                                        | 13375634                                       | 100             | paired-end           |                                                |                      |                                                |                                                |            |          |                                                |                                                |          |                                                           |            |            |                                                           |            |          |                                                           |            |                                                |                                                           |            |          |                            |                                                           |          |          |     |            |                                                           |          |          |     |            |                                                           |          |          |     |            |                                                           |          |         |     |            |            |          |         |     |            |            |          |         |     |            |               |          |         |     |            |
| Tcf1/Lef1-deficient CD8, CTCF ChIP-seq SantaCruz Ab, rep1 | 30933509                                                                                                                                                                                                                                                                                                                                                                                                                                                                                                                                                                                                                                                                                                                                                                                                                                                                                                                                                                                                                                                                                                                                                                                                                                                                                                                                                                                                                                                                                                                                                                                                                                                        | 13686174                                       | 100             | paired-end           |                                                |                      |                                                |                                                |            |          |                                                |                                                |          |                                                           |            |            |                                                           |            |          |                                                           |            |                                                |                                                           |            |          |                            |                                                           |          |          |     |            |                                                           |          |          |     |            |                                                           |          |          |     |            |                                                           |          |         |     |            |            |          |         |     |            |            |          |         |     |            |               |          |         |     |            |
| Tcf1/Lef1-deficient CD8, CTCF ChIP-seq SantaCruz Ab, rep2 | 23355650                                                                                                                                                                                                                                                                                                                                                                                                                                                                                                                                                                                                                                                                                                                                                                                                                                                                                                                                                                                                                                                                                                                                                                                                                                                                                                                                                                                                                                                                                                                                                                                                                                                        | 12270903                                       | 100             | paired-end           |                                                |                      |                                                |                                                |            |          |                                                |                                                |          |                                                           |            |            |                                                           |            |          |                                                           |            |                                                |                                                           |            |          |                            |                                                           |          |          |     |            |                                                           |          |          |     |            |                                                           |          |          |     |            |                                                           |          |         |     |            |            |          |         |     |            |            |          |         |     |            |               |          |         |     |            |
| Tcf1/Lef1-deficient CD8, CTCF ChIP-seq SantaCruz Ab, rep3 | 26923428                                                                                                                                                                                                                                                                                                                                                                                                                                                                                                                                                                                                                                                                                                                                                                                                                                                                                                                                                                                                                                                                                                                                                                                                                                                                                                                                                                                                                                                                                                                                                                                                                                                        | 14160988                                       | 100             | paired-end           |                                                |                      |                                                |                                                |            |          |                                                |                                                |          |                                                           |            |            |                                                           |            |          |                                                           |            |                                                |                                                           |            |          |                            |                                                           |          |          |     |            |                                                           |          |          |     |            |                                                           |          |          |     |            |                                                           |          |         |     |            |            |          |         |     |            |            |          |         |     |            |               |          |         |     |            |
| Tcf1/Lef1-deficient CD8, CTCF ChIP-seq SantaCruz Ab, rep4 | 23035585                                                                                                                                                                                                                                                                                                                                                                                                                                                                                                                                                                                                                                                                                                                                                                                                                                                                                                                                                                                                                                                                                                                                                                                                                                                                                                                                                                                                                                                                                                                                                                                                                                                        | 8626642                                        | 100             | paired-end           |                                                |                      |                                                |                                                |            |          |                                                |                                                |          |                                                           |            |            |                                                           |            |          |                                                           |            |                                                |                                                           |            |          |                            |                                                           |          |          |     |            |                                                           |          |          |     |            |                                                           |          |          |     |            |                                                           |          |         |     |            |            |          |         |     |            |            |          |         |     |            |               |          |         |     |            |
| WT-NA-IgG1                                                | 22007897                                                                                                                                                                                                                                                                                                                                                                                                                                                                                                                                                                                                                                                                                                                                                                                                                                                                                                                                                                                                                                                                                                                                                                                                                                                                                                                                                                                                                                                                                                                                                                                                                                                        | 3089587                                        | 100             | paired-end           |                                                |                      |                                                |                                                |            |          |                                                |                                                |          |                                                           |            |            |                                                           |            |          |                                                           |            |                                                |                                                           |            |          |                            |                                                           |          |          |     |            |                                                           |          |          |     |            |                                                           |          |          |     |            |                                                           |          |         |     |            |            |          |         |     |            |            |          |         |     |            |               |          |         |     |            |
| WT-NA-IgG2                                                | 30755638                                                                                                                                                                                                                                                                                                                                                                                                                                                                                                                                                                                                                                                                                                                                                                                                                                                                                                                                                                                                                                                                                                                                                                                                                                                                                                                                                                                                                                                                                                                                                                                                                                                        | 7705503                                        | 100             | paired-end           |                                                |                      |                                                |                                                |            |          |                                                |                                                |          |                                                           |            |            |                                                           |            |          |                                                           |            |                                                |                                                           |            |          |                            |                                                           |          |          |     |            |                                                           |          |          |     |            |                                                           |          |          |     |            |                                                           |          |         |     |            |            |          |         |     |            |            |          |         |     |            |               |          |         |     |            |
| WT-Na-cst-igg                                             | 20969674                                                                                                                                                                                                                                                                                                                                                                                                                                                                                                                                                                                                                                                                                                                                                                                                                                                                                                                                                                                                                                                                                                                                                                                                                                                                                                                                                                                                                                                                                                                                                                                                                                                        | 1830745                                        | 100             | paired-end           |                                                |                      |                                                |                                                |            |          |                                                |                                                |          |                                                           |            |            |                                                           |            |          |                                                           |            |                                                |                                                           |            |          |                            |                                                           |          |          |     |            |                                                           |          |          |     |            |                                                           |          |          |     |            |                                                           |          |         |     |            |            |          |         |     |            |            |          |         |     |            |               |          |         |     |            |
| Antibodies                                                | Antibody name: Anti-CTCF Antibody; Vendor: Santa Cruz; Catalog#:sc-271514X Lot#: J619                                                                                                                                                                                                                                                                                                                                                                                                                                                                                                                                                                                                                                                                                                                                                                                                                                                                                                                                                                                                                                                                                                                                                                                                                                                                                                                                                                                                                                                                                                                                                                           |                                                |                 |                      |                                                |                      |                                                |                                                |            |          |                                                |                                                |          |                                                           |            |            |                                                           |            |          |                                                           |            |                                                |                                                           |            |          |                            |                                                           |          |          |     |            |                                                           |          |          |     |            |                                                           |          |          |     |            |                                                           |          |         |     |            |            |          |         |     |            |            |          |         |     |            |               |          |         |     |            |
| Peak calling parameters                                   | Read mapping:                                                                                                                                                                                                                                                                                                                                                                                                                                                                                                                                                                                                                                                                                                                                                                                                                                                                                                                                                                                                                                                                                                                                                                                                                                                                                                                                                                                                                                                                                                                                                                                                                                                   |                                                |                 |                      |                                                |                      |                                                |                                                |            |          |                                                |                                                |          |                                                           |            |            |                                                           |            |          |                                                           |            |                                                |                                                           |            |          |                            |                                                           |          |          |     |            |                                                           |          |          |     |            |                                                           |          |          |     |            |                                                           |          |         |     |            |            |          |         |     |            |            |          |         |     |            |               |          |         |     |            |

|                         |                                                                                                                                                                                                                                                                                                                                                                                                                                                                                                                                                                                                                                                                                                                                                                          |
|-------------------------|--------------------------------------------------------------------------------------------------------------------------------------------------------------------------------------------------------------------------------------------------------------------------------------------------------------------------------------------------------------------------------------------------------------------------------------------------------------------------------------------------------------------------------------------------------------------------------------------------------------------------------------------------------------------------------------------------------------------------------------------------------------------------|
| Peak calling parameters | <pre>i=sample_name; \ bowtie2 --mm -p 4 --no-unal --no-mixed --non-deterministic --no-discordant \ -x ~/ncbi/public/index/bowtie2index/mm9/mm9 \ -1 \${i}_R1_val_1.fq.gz \ -2 \${i}_R2_val_2.fq.gz \ -S \${i}.sam Peak calling: i=sample_name; \ macs2 callpeak -t \${i}_sorted_rmdup.bam \ -c WT-NA-IgG1_sorted_rmdup.bam \ WT-NA-IgG2_sorted_rmdup.bam \ WT-Na-cst-igg_sorted_rmdup.bam \ -f BAMPE -g mm -n \${i} -B -q 0.05 --fe-cutoff 2 --SPMR \ --outdir ../macs2_igG #for separate replicates  macs2 callpeak -t \${i}_sorted_rmdup.bam \ -c WT-NA-IgG1_sorted_rmdup.bam \ WT-NA-IgG2_sorted_rmdup.bam \ WT-Na-cst-igg_sorted_rmdup.bam \ -f BAMPE -g mm -n \${i} -B -q 0.05 --fe-cutoff 4 --SPMR \ --outdir ../macs2_igG #for merged replicates bam files.</pre> |
| Data quality            | Four replicates were performed for each genotype. Each replicate was processed, and all replicates had similar numbers of peaks called with MACS2. Peaks were called under stringent criteria: summit fold change $\geq 2$ and FDR < 0.05 (separate replicates); summit fold change $\geq 4$ and FDR < 0.05 (merged replicates)                                                                                                                                                                                                                                                                                                                                                                                                                                          |
| Software                | FastQC (v0.11.4), Trim Galore(0.6.4_dev), bowtie2(v2.2.5), samtools(v.1.7), Picard( <a href="http://broadinstitute.github.io/picard/">http://broadinstitute.github.io/picard/</a> ), bedtools(v.2.30.0), MACS2(v2.1.1), R(4.0.4), deeptools(3.5.1), edgeR(v.3.28.1), chromVAR(v.1.12.0), motifmatchr(v.1.12.0), HOMER(v.4.11)                                                                                                                                                                                                                                                                                                                                                                                                                                            |

## Flow Cytometry

### Plots

Confirm that:

- The axis labels state the marker and fluorochrome used (e.g. CD4-FITC).
- The axis scales are clearly visible. Include numbers along axes only for bottom left plot of group (a 'group' is an analysis of identical markers).
- All plots are contour plots with outliers or pseudocolor plots.
- A numerical value for number of cells or percentage (with statistics) is provided.

### Methodology

|                           |                                                                                                                                                                      |
|---------------------------|----------------------------------------------------------------------------------------------------------------------------------------------------------------------|
| Sample preparation        | Mouse spleens and lymph nodes were collected, and single cell suspension was made following standard procedures.                                                     |
| Instrument                | FACSARIA (BD Biosciences) for cell sorting, and FACSVerse (BD Biosciences) for analysis.                                                                             |
| Software                  | FACSDiva (BD Biosciences) software was used for data collection. FlowJo v10.2 was used for data analysis.                                                            |
| Cell population abundance | $\geq 95\%$ on sorted cells, which was determined by flow cytometry analysis on post-sorted cells.                                                                   |
| Gating strategy           | Live lymphocytes were gated the known location through FSC-A/SSC-A. Doublets were removed by using FSC-A/FSC-W. CD4 and CD8 T cells cells were gated on TCRb+ cells. |

- Tick this box to confirm that a figure exemplifying the gating strategy is provided in the Supplementary Information.
