# Supplementary material
Source: PubMed Central journal article supplement (PMC9579964)

Figure 4a

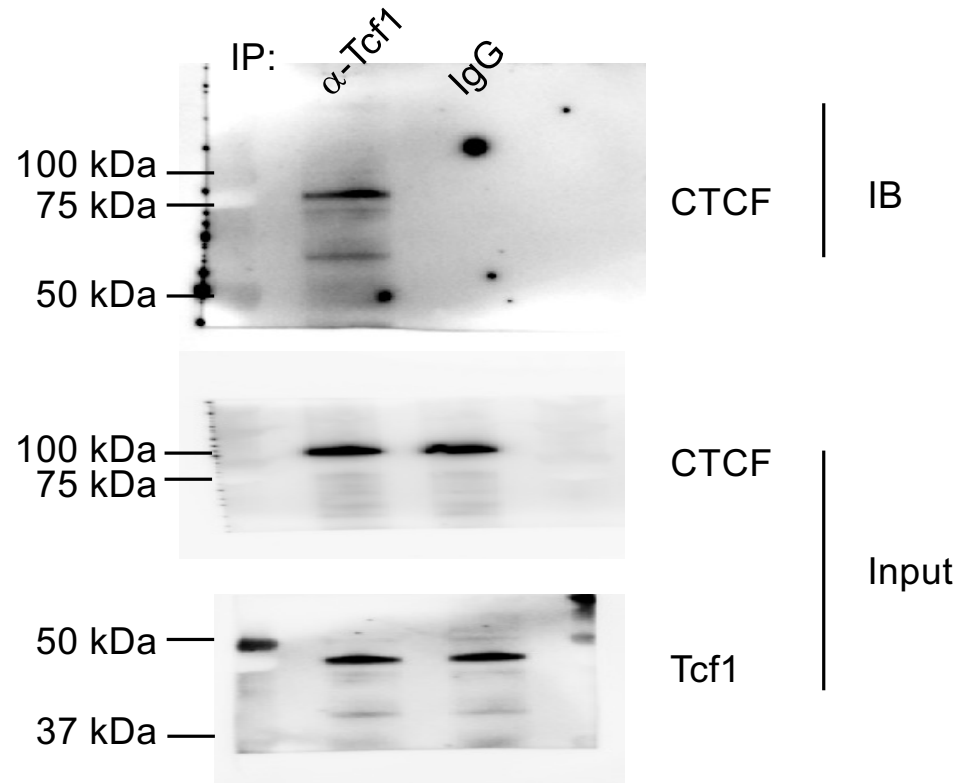

Figure 4b

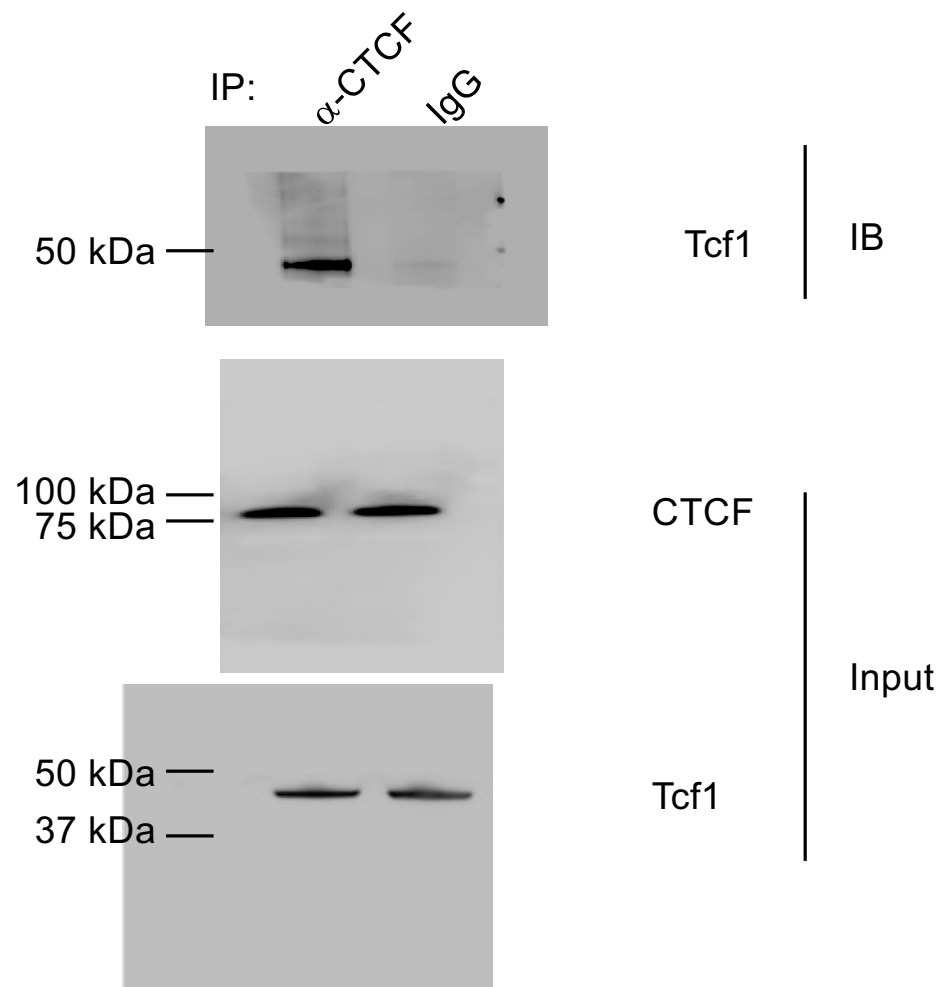

Figure 4c

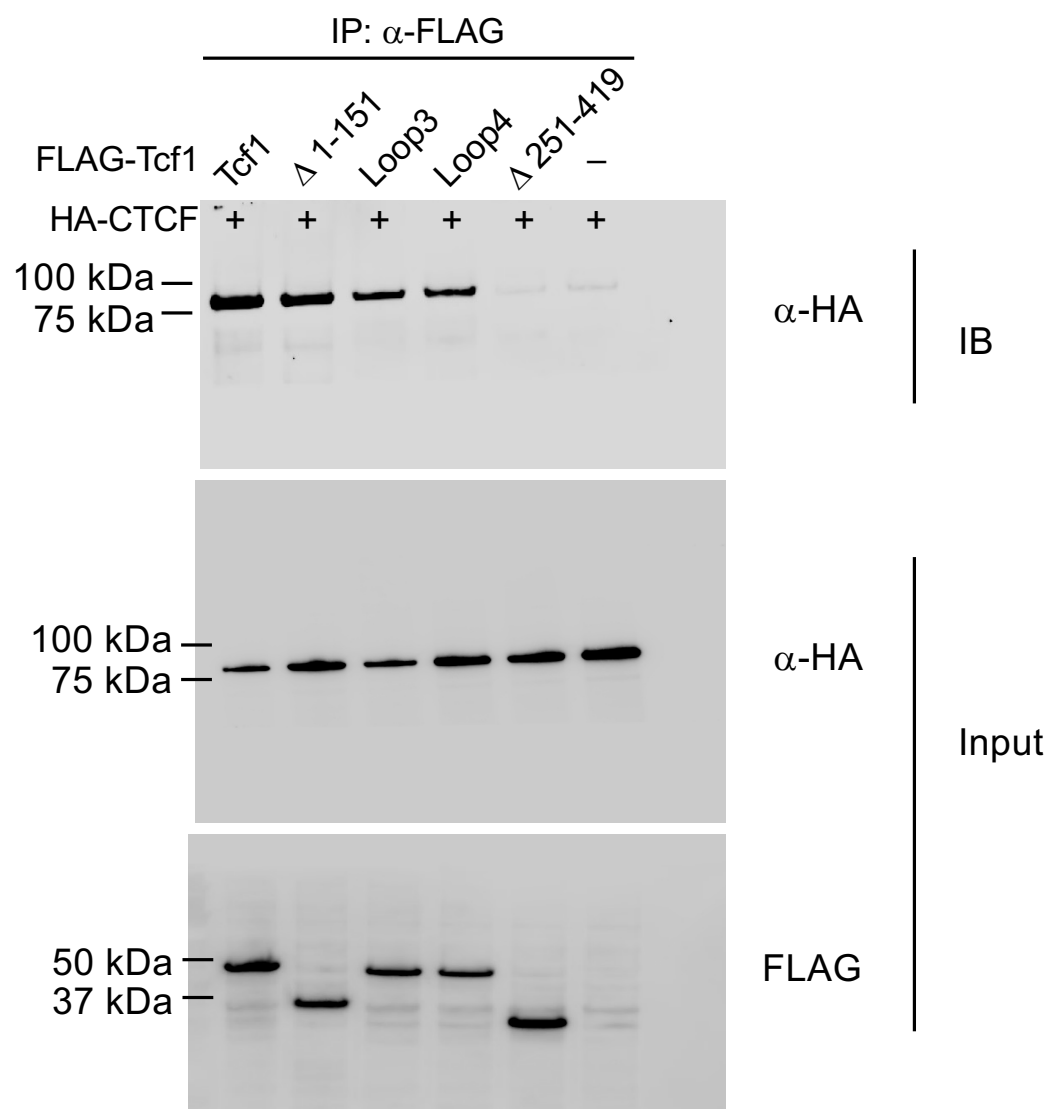

Figure 4d

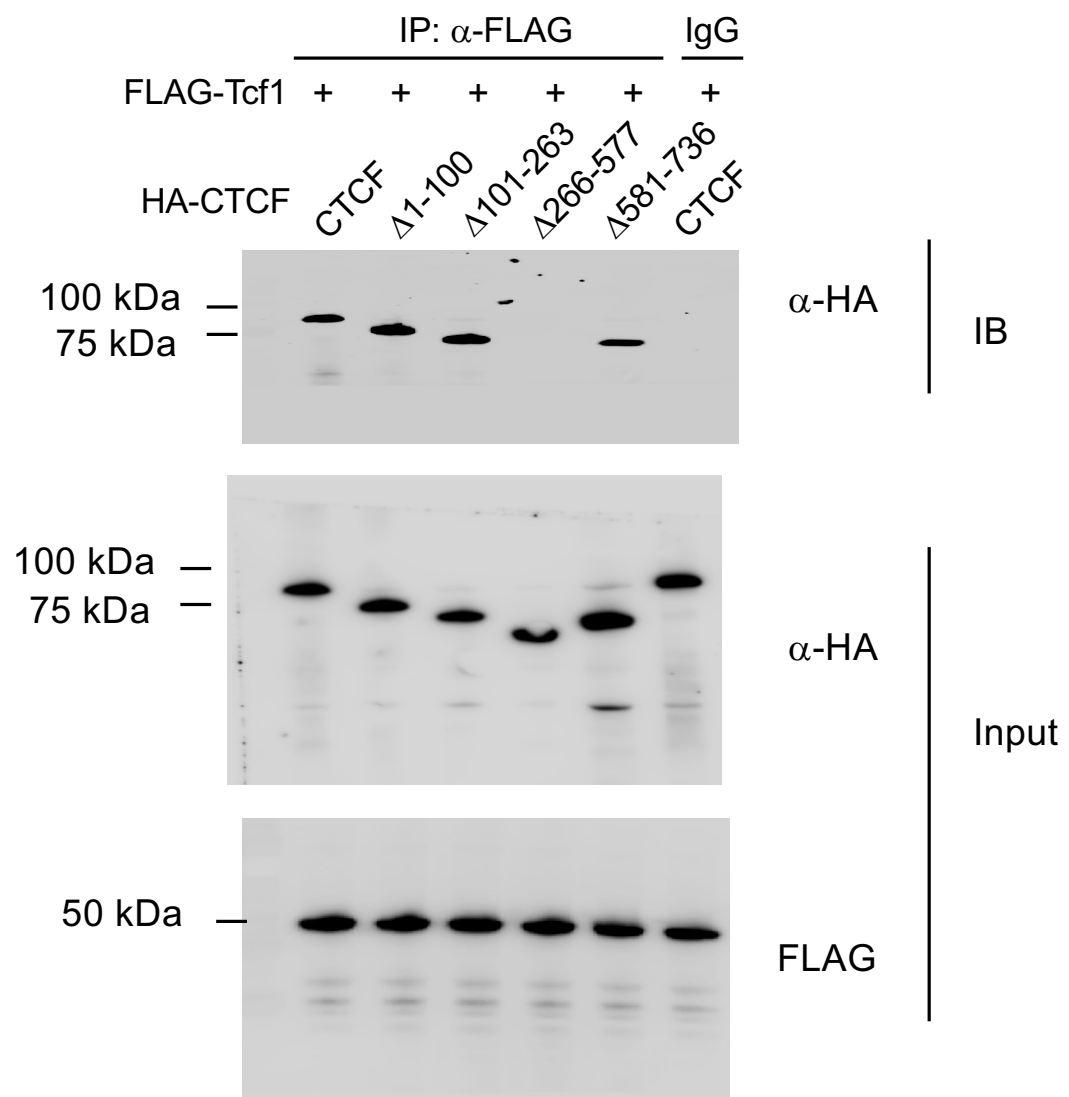

Supplement: NIHMS1838968-supplement-1838968_SD_Fig_4.pdf [file NIHMS1838968-supplement-1838968_SD_Fig_4.pdf]
